# Supplementary material
Source: PubMed Central journal article supplement (PMC2881166)

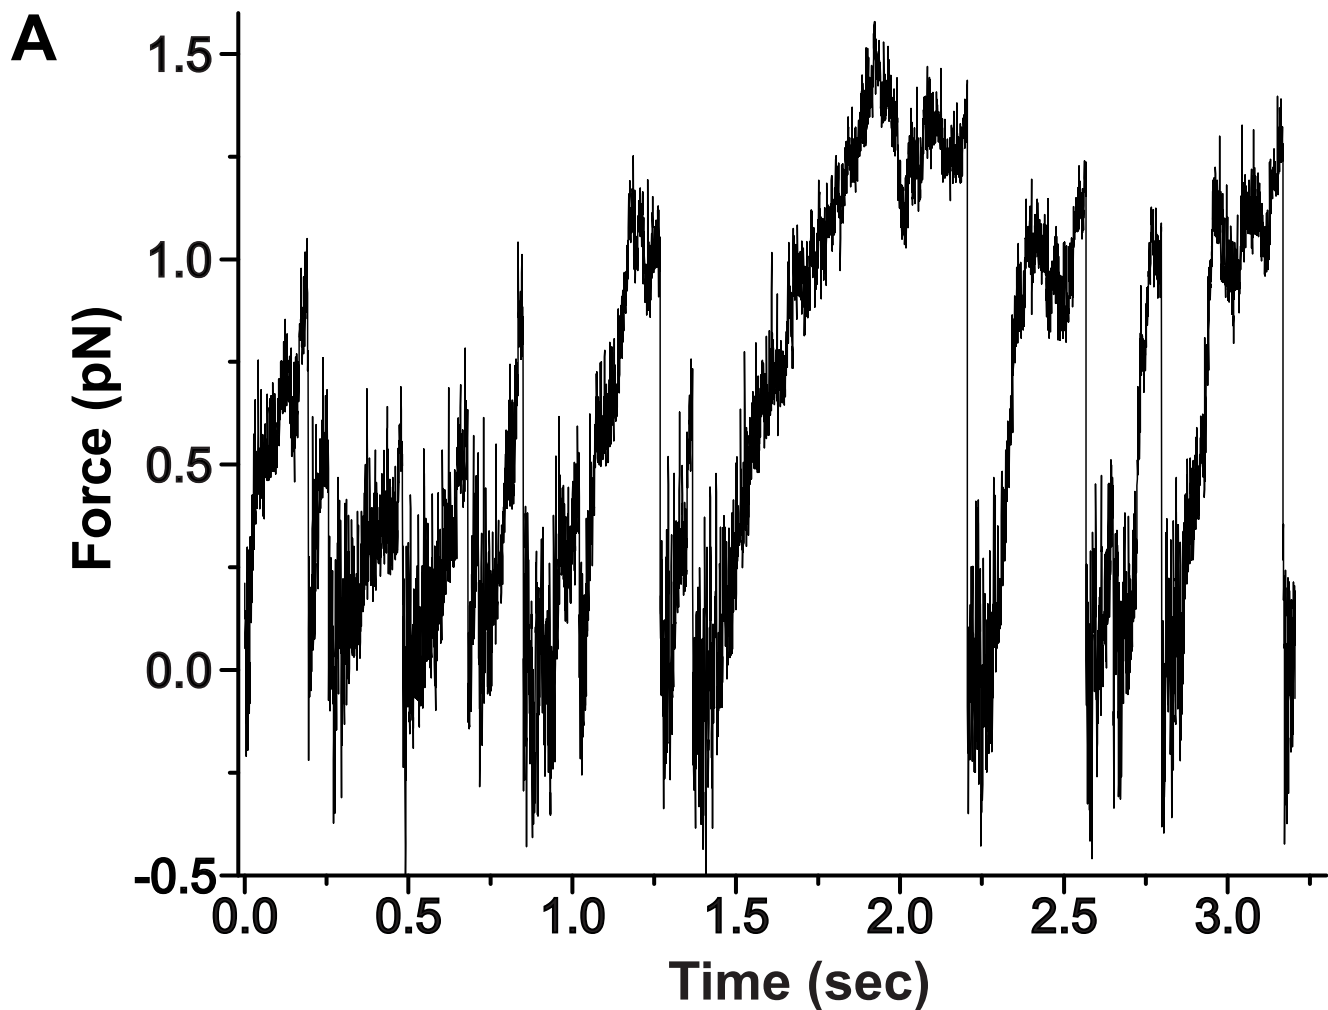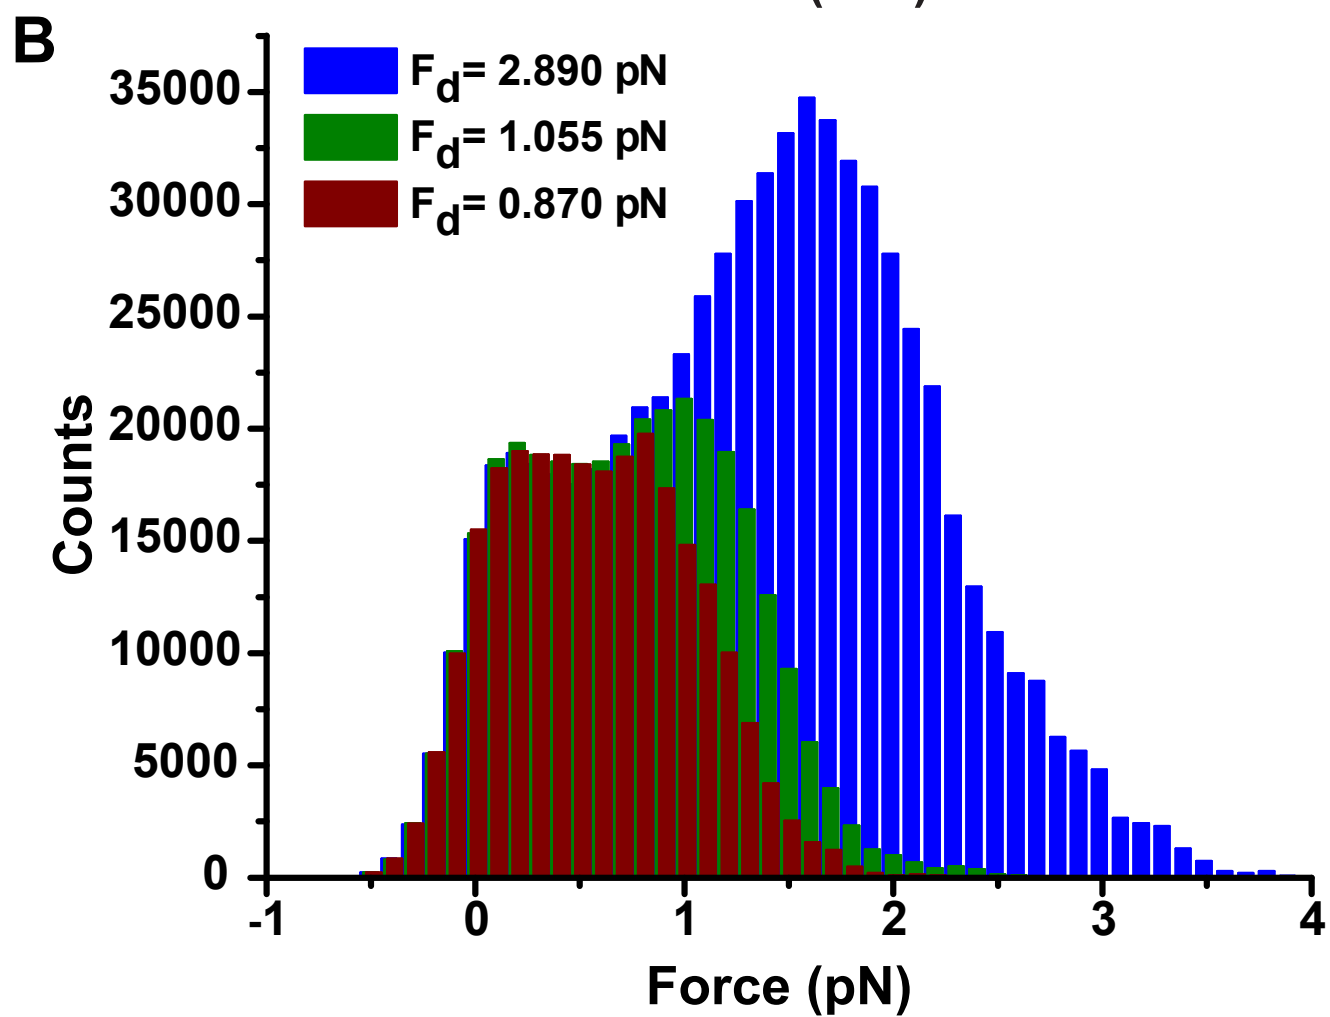

Supplement: NIHMS184606-supplement-02.pdf [file NIHMS184606-supplement-02.pdf]
